# Supplementary material
Source: PubMed Central journal article supplement (PMC6940517)
Supplement: NIHMS1058188-supplement-Supplemental_Material.pdf [file NIHMS1058188-supplement-Supplemental_Material.pdf]

## Supplementary Material

### Secular Economic Trends Relevant to the Pittsburgh ADHD Longitudinal Study (PALS)

The timing of the PALS study included the Great Recession, which is defined as spanning from December 1, 2007 to June 30, 2009 (<https://www.nber.org/cycles/>). This brings up two issues. First, if the financial functioning of PALS participants was evaluated during the Great Recession, this may have affected the level of financial distress that was observed in the full sample (e.g., increased rates of unemployment). 17% of the age 25 interviews and 19% of age 30 interviews occurred during the Great Recession, suggesting that the full sample's financial functioning may be slightly lower than it would have had all cases been evaluated outside of an economic recession. Second, if the financial functioning of either the probands or controls was more likely to have been evaluated during the Great Recession, this could confound any group differences we observed in financial functioning. However, the proportion of probands' interviews (18.5%) and controls' interviews (17.1%) that occurred within the Great Recession was quite similar, suggesting the groups received equivalent exposure to an economy in recession.

### Finances Questionnaire

A questionnaire was designed for the PALS follow-up to collect data on earnings, savings, dependence on family or others, credit cards, debt, and other relevant financial habits. The self-report form included 28 items, including binary responses (e.g., "Do you own a home?"), categorical responses ("Mark the interval indicating how much debt you are in."), and open-ended responses ("How much money do you have in savings?"). Sensitivity analyses suggested results were robust to extreme values in the open-ended responses (see later section in supplement). The parent-report form included 16 items, some of which were duplicates of

questions asked on the self-report form and some of which were not present on that form (e.g., “Have you ever co-signed a loan for your son/daughter?”). Parents did not report on outcomes of which they were unlikely to have knowledge (e.g., balance of participant’s savings account). All financial outcomes were measured by either self- or parent-report. Visit dates ranged from August 1999 to July 2017, indicating the need to adjust dollar amounts for inflation. All reported dollar amounts were rescaled to January 2018 USD based on the Bureau of Labor Statistics’ historical consumer price index for all urban consumers (CPI-U), using the month and year that the financial questionnaire was completed. When categorical response options were used to indicate dollar amounts (e.g., \$500-999, \$1000-1499), response were recoded to the dollar amount in the center of the range before inflation adjustment and analysis.

### **Missing Data**

**Rate of missing data.** Employment status was available for 518 participants at age 25 (86%) and for 474 participants at age 30 (78%). For the financial status questionnaire, at age 25, self-report data were available for 474 participants (22% missing) and parent-report data were available for 383 participants (37% missing). At age 30, self-report data were available for 435 participants (22% missing) and parent-report data were available for 386 participants (36% missing).

**Handling of missing data.** Missing data were addressed using multiple imputation by chained equations (White, Royston, & Wood, 2011) in the *mice* package (van Buuren & Groothuis-Oudshoorn, 2011), assuming data to be Missing at Random (MAR; Rubin, 1976). To increase the plausibility of the MAR assumption, the imputation model was comprehensive and included auxiliary variables that were predictive of both missingness and missing values (Collins, Schafer, & Kam, 2001). Age 25 outcomes were permitted to predict age 30 outcomes

and vice versa. ADHD status and several auxiliary variables (child sex, child race, parents' marital status, parent's education, child's estimated full-scale IQ, child's education attained by age 22, and child's delinquency in adolescence) were included as predictors of all variables to be imputed. The remaining variables were used as predictors whenever (a) they correlated at above 0.10 with either the value on the variable to be imputed or an indicator of missingness on that variable and (b) more than 50% of cases were usable. Logistic regression was used to impute missing values on binary variables; normal regression was used to impute missing values on estimated full-scale IQ; and predictive mean matching was used to impute all other missing values. Visual comparison of the observed versus imputed data did not reveal any variables with a very discrepant or implausible pattern of results (Abayomi, Gelman, & Levy, 2008).

### **Significance Testing of Difference-in-Differences for Binary Outcomes**

Difference-in-differences for binary outcomes were first analyzed with logistic regression, mimicking our approach for the one-wave data (i.e., group differences at age 30). However, the interaction term in these models reflects the difference-in-differences on the log-odds metric, which may not correspond with the difference-in-differences on the probability metric (Ai & Norton, 2003; Puhani, 2012). Accordingly, we also report results using the linear probability model (Cox, 1970) for comparison.

### **Rationale for Restriction of Sample for Projection of Lifetime Income and Net Worth at Retirement**

Our sample was almost entirely male (89%). The inclusion of females in income projections complicates interpretation of results, since the employment status of females is more likely than that of males to reflect temporary differences due to pregnancy/childbirth or structural differences due to the choice to stay at home with children. For example, we would not expect to

see any difference in earnings between ADHD and control participants if they are staying at home with children, rather than in the workforce. Our sample was also primarily white (82%) or African American (10%), with very few participants in the remaining ethnic categories. Income differs by ethnicity, such that differences in the ethnic makeup from sample-to-sample would affect differences in projected income. Since we are already stratifying on age, employment status, and education, Census coverage can become weak when also stratifying on race and ethnicity variables (e.g., Asian males, age 50-54, with a graduate degree, currently employed part-time). Thus, to focus on the comparison of interest (ADHD adults vs. controls) and ensure adequate Census coverage, projections of lifetime income and net worth at retirement were restricted to only the white, male portion of the sample ( $N = 444$ ).

### **Using Census ACS Data for Projections of Lifetime Income**

We used the synthetic work-life earnings approach of Day and Newburger (2002) to project income. To build a reference dataset, we downloaded the person-level data from the Census' American Community Survey (ACS) 2016 release of past-five-year data via the Integrated Public Use Microdata Series (IPUMS) (Ruggles, Genadek, Goeken, Grover, & Sobek, 2017). This release included ACS data collected between January 1, 2012 and December 31, 2016. Reported income is pre-scaled to 2016 dollars in the IPUMS five-year release, and these estimates were then multiplied by 1.046 to further rescale them to January 2018 dollars (Bureau of Labor Statistics, 2018). Education was recoded to match the categories used in the PALS study, which required collapsing Masters, Professional, and Doctoral degrees in the ACS to the single "Graduate degree" category used in PALS.

The ACS data were filtered to include only white, non-Hispanic male respondents between the ages of 25 and 64 ( $N = 2,785,746$ ), then grouped according to (a) age, (b)

employment status (unemployed / employed part-time / employed full-time, where full-time was defined as 35+ hours per week), and (c) education level. Age was defined in five-year spans (ages 25-29, 30-34, 35-39, etc.) in order to retain a larger number of respondents in each age-employment-education cell than would be left if age were defined by a single age. This procedure resulted in a total of 144 age-employment-education cells, and mean annual income (i.e., INCTOT) within each cell were calculated using the person-level sampling weights (i.e., PERWT). See Tables S2 and S3 for the resulting estimates.

**Rescaling for Method B.** In Method B, estimates were rescaled based on how closely each group tracked its Census-projected growth from age 25 to age 30. *Projected* growth in income was calculated using the mean income of Census respondents at age 24-26 and 29-31, weighted to match the PALS' ADHD and control groups on education and employment. *Actual* growth in income was calculated using the monthly incomes reported by the PALS' ADHD and control groups at ages 25 and 30. Projected and actual estimates were compared to evaluate how closely each group tracked its projected increase in income. Finally, synthetic estimates of lifetime income at different ages (Table S8) were rescaled such that each group captured the same proportion of Census-projected growth between ages 30 and 64 as they did between ages 25 and 30. See Table S9 for the resulting estimates.

#### **Using Census SIPP Data for Projections of Net Worth at Retirement (Method A)**

To build a reference dataset for net worth at retirement, we downloaded the person-level data from wave 1 of the 2014 panel of the Survey on Income and Program Participation (SIPP) (<https://www.census.gov/programs-surveys/sipp/data/2014-panel/wave-1.html>). Reported dollar amounts were multiplied by 1.060 to rescale them to January 2018 USD (Bureau of Labor Statistics, 2018). Education was recoded to match the categories used in the PALS study, which

required collapsing Masters, Professional, and Doctoral degrees in the ACS to the single “Graduate degree” category used in PALS.

The SIPP data were filtered to include only white, non-Hispanic male respondents between the ages of 65 and 69. This age range was used to produce estimates of net worth at retirement, while still retaining a reasonable number of respondents within each educational category (see *Ns* in Table S10). The SIPP interview asks about multiple months of information, so responses covering the most proximal month were used (i.e., records where MONTHCODE = 12). Employment status within this age range is confounded with retirement status. Thus, in contrast to the income projections, projections of net worth were made solely based on education. Mean net worth (i.e., TNETWORTH) within each education stratum was calculated using the person-level sampling weights (i.e., WPFINWGT). Table S10 reports the resulting estimates.

#### **Using Census ACS Data for Projections of Net Worth at Retirement (Method B)**

In the SIPP-based projections (Method A), group differences in projected net worth at retirement arise solely from group differences in education attained (e.g., fewer of those in the ADHD group obtained Bachelor’s degrees). No adjustments are made for ADHD/control differences in employment status or in the amount of net worth accumulated each year, due to the nature of the SIPP dataset. In Method B, we return to the ACS-based income projections and make assumptions about savings and investing behavior in order to partially address these limitations.

**Procedure.** To project net worth at retirement using the ACS-based income projections, we started with the rescaled estimates of income in five-year age bands (i.e., the values in Table S6). The following procedure was then repeated for each combination of assumed savings rate

for the ADHD group ( $S_{\text{adhd}}$ ), assumed savings rate for the control group ( $S_{\text{ctrl}}$ ), and assumed interest rate ( $ROI$ ). We calculated the projected net worth at retirement for each profile of ADHD-education-employment at age 30 (i.e., row in Table S6). Each row in Table S6 was converted into a vector of incomes at each age in years ( $a$ ) from 25 to 64, where income within each five-year age band was constant. This vector of income at each age was converted into a vector of *contribution to savings* at each age by multiplying it by the savings rate of the respective group (i.e.,  $S_{\text{ctrl}}$  or  $S_{\text{adhd}}$ ). The final value (i.e., value at age 64) of this vector of contributions to savings was calculated by iterating along this vector, where total savings to date was calculated as the amount accumulated at the previous age ( $a - 1$ ) multiplied by  $[1 + ROI]$ , plus the contribution at the current age ( $a$ ).

This procedure produced an estimated net worth at retirement (i.e., age 64) for every combination of ADHD status, education, and employment (i.e., row in Table S7). The entire procedure was repeated for various values of  $S_{\text{ctrl}}$ ,  $S_{\text{adhd}}$ , and  $ROI$ , producing estimates under each combination of these assumptions. To compute group differences in net worth at retirement under each combination of assumptions, each PALS participant was assigned the projected net worth for their given ADHD-education-employment profile, and the means of the ADHD and control groups were then calculated. Projections for the ADHD and control groups under different assumptions are reported in Table S6 and shown in Figure S2.

**Upper bound on projected estimates.** Projections (Table S6 and Figure S2) include some implausibly large estimates of savings at retirement. While these follow from the assumptions, these assumptions may not mimic real-world saving and investing habits. For example, very few Americans save 10% of their salary every year. The SIPP data can be used to calculate an upper bound on projected estimates as follows. The mean net worth at retirement in

the entire SIPP data (i.e., among white males) was \$523k, suggesting the *population-level* mean difference in net worth associated with ADHD should be no more than \$581k (assuming 10% of individuals have ADHD, and these 10% have a mean net worth of \$0). Thus, deficits greater than \$600k only reflect the differences that *would* be manifest if the assumptions were true.

### **Sensitivity Analysis #1: Adjusting for Intelligence**

Probands exhibited lower intelligence quotients than controls at baseline (Table S1), as would be expected based on past literature (Frazier, Demaree, & Youngstrom, 2004; Jepsen, Fagerlund, & Mortensen, 2009). Since lower performance on intelligence tests may be at least in part caused by the ADHD syndrome, adjusting for intelligence when examining the association of ADHD with outcomes is a questionable practice (Meehl, 1971). Much like the effect of ADHD when adjusting for impulsivity (i.e., equating probands and controls on impulsivity) would not be particularly meaningful, the marginal effect of ADHD when adjusting for performance on an intelligence test is difficult to interpret.

Nonetheless, we reran the analyses reported in Table 1 and included intelligence quotient as a covariate. Considering the pattern of statistical significance in the final two columns of Table 1, only two (of a possible 28) results changed. Two ADHD-control differences at age 30 were no longer statistically significant: adult report of “Regularly receives money from parents/family” and parent report of “Ever moved back home after first leaving.” The pattern of statistical significance in difference-in-differences remained identical. Thus, our conclusions were not affected by the difference in intelligence observed at baseline.

### **Sensitivity Analysis #2: Winsorizing Extreme Response Values**

Several financial outcome variables had unrestricted response formats, such that analyses might be vulnerable to the influence of outliers. For example, while 95% of respondents



indicated less than \$20k in savings, one respondent indicated \$300k. To probe the potential impact of outliers, analyses were repeated for this subset of outcome variables after Winsorizing the upper tail of the distribution. All responses above the 95<sup>th</sup> percentile were recoded to the value at the 95<sup>th</sup> percentile, and this recoding was conducted separately for the age 25 and age 30 data.

**Results.** The exact same pattern of statistical significance was obtained for both ADHD-control differences at age 30 and difference-in-differences (i.e., the rightmost columns of Table 1 were unchanged). The group means were lower in the Winsorized analyses, as would be expected from recoding the highest values. Thus, sensitivity analyses suggest that results are robust to the influence of extreme values on financial outcomes.

### **Back-of-the-Envelope Calculations of Societal Impact**

Mean person-level income in the United States was \$44,328.21 in the 2016 ACS 5-year release, which we adjusted to January 2018 USD (\$46,377.83). Population of the United States between ages 18 and 64 was 200,339,058 in 2016

(<https://www.census.gov/quickfacts/fact/table/US/PST045217>). Ratio of mean income in ADHD and control groups was 0.63 at age 30 in PALS data. Assuming a prevalence rate of 8.4% (Danielson et al., 2018), and that the income ratio (0.63) is constant over time, we solved for the mean income in ADHD and non-ADHD groups on a national level, then multiplied this discrepancy by the prevalence rate and the overall adult population of 200,339,058. The resulting estimates was \$301,068,100,000.

## References

- Abayomi, K., Gelman, A., & Levy, M. (2008). Diagnostics for multivariate imputations. *Journal of the Royal Statistical Society: Series C (Applied Statistics)*, *57*, 273–291.
- Ai, C., & Norton, E. C. (2003). Interaction terms in logit and probit models. *Economics Letters*, *80*, 123–129.
- Barkley, R. A., Fischer, M., Smallish, L., & Fletcher, K. (2006). Young adult outcome of hyperactive children: Adaptive functioning in major life activities. *Journal of the American Academy of Child & Adolescent Psychiatry*, *45*, 192–202.
- Biederman, J., Petty, C. R., Woodworth, K. Y., Lomedico, A., Hyder, L. L., & Faraone, S. V. (2012). Adult outcome of attention-deficit/hyperactivity disorder: A controlled 16-year follow-up study. *The Journal of Clinical Psychiatry*, *73*, 941–950.
- Collins, L. M., Schafer, J. L., & Kam, C.-M. (2001). A comparison of inclusive and restrictive strategies in modern missing data procedures. *Psychological Methods*, *6*, 330–351.
- Cox, D. R. (1970). Simple regression. In *Analysis of Binary Data* (pp. 33–42). London: Methuen.
- Danielson, M. L., Bitsko, R. H., Ghandour, R. M., Holbrook, J. R., Kogan, M. D., & Blumberg, S. J. (2018). Prevalence of parent-reported ADHD diagnosis and associated treatment among U.S. children and adolescents, 2016. *Journal of Clinical Child & Adolescent Psychology*, *47*, 199–212.
- Day, J. C., & Newburger, E. C. (2002). *The big payoff: Educational attainment and synthetic estimates of work-life earnings* (No. P23-210). Washington, D.C.: U.S. Census Bureau.
- Frazier, T. W., Demaree, H. A., & Youngstrom, E. A. (2004). Meta-analysis of intellectual and neuropsychological test performance in Attention-Deficit/Hyperactivity Disorder. *Neuropsychology*, *18*, 543–555.

Hechtman, L., Swanson, J. M., Sibley, M. H., Stehli, A., Owens, E. B., Mitchell, J. T., ...

Nichols, J. Q. (2016). Functional adult outcomes 16 years after childhood diagnosis of Attention-Deficit/Hyperactivity Disorder: MTA results. *Journal of the American Academy of Child & Adolescent Psychiatry*. <https://doi.org/10.1016/j.jaac.2016.07.774>

Jepsen, J. R. M., Fagerlund, B., & Mortensen, E. L. (2009). Do attention deficits influence IQ assessment in children and adolescents with ADHD? *Journal of Attention Disorders*, *12*, 551–562.

Klein, R. G., Mannuzza, S., Olazagasti, M. A. R., Roizen, E., Hutchison, J. A., Lashua, E. C., & Castellanos, F. X. (2012). Clinical and functional outcome of childhood Attention-Deficit/Hyperactivity Disorder 33 years later. *Archives of General Psychiatry*, *69*, 1295–1303.

Meehl, P. E. (1971). High school yearbooks: A reply to Schwarz. *Journal of Abnormal Psychology*, *77*, 143–148.

Molina, B. S. G., Hinshaw, S. P., Swanson, J. M., Arnold, L. E., Vitiello, B., Jensen, P. S., ...

Houck, P. R. (2009). The MTA at 8 years: Prospective follow-up of children treated for combined-type ADHD in a multisite study. *Journal of the American Academy of Child & Adolescent Psychiatry*, *48*, 484–500.

Molina, B. S. G., Sibley, M. H., Pedersen, S. L., & Pelham, W. E. (2016). The Pittsburgh ADHD Longitudinal Study. In L. T. Hechtman (Ed.), *Attention-Deficit Hyperactivity Disorder: Adult Outcomes and its Predictors*. New York, NY: Oxford University Press.

Owens, E. B., Zalecki, C., Gillette, P., & Hinshaw, S. P. (2017). Girls with childhood ADHD as adults: Cross-domain outcomes by diagnostic persistence. *Journal of Consulting and Clinical Psychology*, *85*, 723–736.

- Puhani, P. A. (2012). The treatment effect, the cross difference, and the interaction term in nonlinear “difference-in-differences” models. *Economics Letters*, *115*, 85–87.
- Rubin, D. B. (1976). Inference and missing data. *Biometrika*, *63*, 581–592.
- Ruggles, S., Genadek, K., Goeken, R., Grover, J., & Sobek, M. (2017). *Integrated Public Use Microdata Series: Version 7.0 [dataset]*. Minneapolis, MN: University of Minnesota.
- van Buuren, S. van, & Groothuis-Oudshoorn, K. (2011). mice: Multivariate imputation by chained equations in R. *Journal of Statistical Software*, *45*, 1–67.
- White, I. R., Royston, P., & Wood, A. M. (2011). Multiple imputation using chained equations: Issues and guidance for practice. *Statistics in Medicine*, *30*, 377–399.

Table S1  
*Comparison of Controls and Probands at Baseline*

| <b>Variable</b>                 | <b>Controls (N = 240)</b> | <b>Probands (N = 364)</b> |
|---------------------------------|---------------------------|---------------------------|
| Female                          | 11 %                      | 10 %                      |
| <i>Race</i>                     |                           |                           |
| White                           | 85 %                      | 81 %                      |
| Black                           | 9 %                       | 11 %                      |
| Other                           | 6 %                       | 8 %                       |
| Estimated Full-Scale IQ         | 111 (14.4)                | 101 (15.8)                |
| <i>Highest parent education</i> |                           |                           |
| No high school                  | 8 %                       | 13 %                      |
| High school grad / GED          | 10 %                      | 7 %                       |
| Partial college                 | 12 %                      | 17 %                      |
| Associates / 2-year degree      | 8 %                       | 13 %                      |
| Bachelor's degree               | 26 %                      | 26 %                      |
| Graduate training               | 35 %                      | 24 %                      |

*Note.* IQ = intelligence quotient, GED = General Education Diploma. IQ is reported as mean (standard deviation). All other values are proportion of group meeting criterion.

Table S2  
*Probands' and Controls' Educational Attainment at Age 25*

| <b>Education</b>           | <b>Controls (N = 240)</b> | <b>Probands (N = 364)</b> |
|----------------------------|---------------------------|---------------------------|
| No high school diploma     | 1 %                       | 9 %                       |
| High school diploma or GED | 3 %                       | 19 %                      |
| Some college               | 33 %                      | 47 %                      |
| Associate's degree         | 7 %                       | 12 %                      |
| Bachelor's degree          | 53 %                      | 14 %                      |
| Graduate degree            | 3 %                       | 0 %                       |

*Note.* Based on participant report at age 25 visit. Difference between controls and probands is statistically significant,  $\chi^2(5) = 139.13, p < .001$ .

Table S3

*Financial Outcomes at Age 30 for Controls, Probands with Desistant Childhood ADHD, and Probands with Persistent Childhood ADHD*

| Inform.                                                            | Outcome                                                            | Descriptive Statistics at Age 30 |                                             |                                        |                                    | Inference                                |                                                |                                                     |
|--------------------------------------------------------------------|--------------------------------------------------------------------|----------------------------------|---------------------------------------------|----------------------------------------|------------------------------------|------------------------------------------|------------------------------------------------|-----------------------------------------------------|
|                                                                    |                                                                    | Controls<br>N = 240              | Probands by Status of DSM Symptoms of ADHD  |                                        |                                    | Controls vs.<br>Probands<br>significant? | Controls vs.<br>Any Desistance<br>significant? | Controls vs.<br>Complete Desistance<br>significant? |
|                                                                    |                                                                    |                                  | Complete Desistance <sup>a</sup><br>N = 103 | Any Desistance <sup>b</sup><br>N = 227 | Persistence <sup>c</sup><br>N = 70 |                                          |                                                |                                                     |
| Adult                                                              | Currently employed full-time                                       | 80%                              | 69%                                         | 69%                                    | 56%                                | *                                        | *                                              | *                                                   |
|                                                                    | Currently unemployed                                               | 13%                              | 17%                                         | 18%                                    | 31%                                | *                                        |                                                |                                                     |
|                                                                    | Living with parents/family                                         | 12%                              | 30%                                         | 28%                                    | 39%                                | *                                        | *                                              | *                                                   |
|                                                                    | Regularly receives money from parents/family                       | 5%                               | 4%                                          | 10%                                    | 11%                                | *                                        |                                                |                                                     |
|                                                                    | Monthly rent/housing expenses                                      | \$ 852 [436, 1204]               | \$ 593 [172, 918]                           | \$ 525 [53, 731]                       | \$ 426 [0, 642]                    | *                                        | *                                              | *                                                   |
|                                                                    | Receiving welfare/government assistance                            | 6%                               | 5%                                          | 8%                                     | 15%                                | *                                        |                                                |                                                     |
|                                                                    | Monthly income                                                     | \$ 3530 [1724, 4548]             | \$ 2749 [1588, 4244]                        | \$ 2426 [869, 4160]                    | \$ 1726 [413, 2622]                | *                                        | *                                              | *                                                   |
|                                                                    | Money in savings account                                           | \$ 9970 [13, 8545]               | \$ 5215 [0, 4246]                           | \$ 4741 [0, 2296]                      | \$ 1769 [0, 1042]                  | *                                        | *                                              |                                                     |
|                                                                    | Number of credit cards                                             | 2.68 [1, 4]                      | 1.52 [0, 2]                                 | 1.68 [0, 2]                            | 1.08 [0, 1]                        | *                                        | *                                              | *                                                   |
|                                                                    | Number of times rejected for credit card                           | 0.83 [0, 1]                      | 1.39 [0, 1]                                 | 2.11 [0, 2]                            | 1.79 [0, 2]                        | *                                        | *                                              |                                                     |
|                                                                    | Number of times credit card cancelled by issuer                    | 0.25 [0, 0]                      | 0.23 [0, 0]                                 | 0.33 [0, 0]                            | 0.26 [0, 0]                        |                                          |                                                |                                                     |
|                                                                    | Ever moved back home after first leaving                           | 28%                              | 29%                                         | 29%                                    | 35%                                |                                          |                                                |                                                     |
|                                                                    | How many times moved back home after first leaving                 | 0.36 [0, 1]                      | 0.41 [0, 1]                                 | 0.39 [0, 1]                            | 0.51 [0, 1]                        |                                          |                                                |                                                     |
|                                                                    | Has debt                                                           | 41%                              | 33%                                         | 40%                                    | 35%                                |                                          |                                                |                                                     |
|                                                                    | Money in debt                                                      | \$ 2299 [0, 3400]                | \$ 2064 [0, 3377]                           | \$ 2270 [0, 3377]                      | \$ 1807 [0, 845]                   |                                          |                                                |                                                     |
|                                                                    | Ever received emergency funds from parents                         | 35%                              | 27%                                         | 37%                                    | 40%                                |                                          |                                                |                                                     |
|                                                                    | Number of times in past year received emergency funds from parents | 0.40 [0, 0]                      | 0.29 [0, 0]                                 | 0.60 [0, 0]                            | 1.03 [0, 1]                        |                                          |                                                |                                                     |
|                                                                    | Money in emergency funds received in past year from parents        | \$ 414 [0, 0]                    | \$ 156 [0, 0]                               | \$ 466 [0, 0]                          | \$ 473 [0, 354]                    |                                          |                                                |                                                     |
|                                                                    | Owens a home                                                       | 42%                              | 32%                                         | 26%                                    | 10%                                | *                                        | *                                              |                                                     |
|                                                                    | Parent                                                             | Living with parents/family       | 9%                                          | 24%                                    | 26%                                | 35%                                      | *                                              | *                                                   |
| Regularly receives money from parents/family                       |                                                                    | 8%                               | 16%                                         | 19%                                    | 32%                                | *                                        | *                                              |                                                     |
| Ever received emergency funds from parents                         |                                                                    | 37%                              | 43%                                         | 51%                                    | 71%                                | *                                        | *                                              |                                                     |
| Number of times in past year received emergency funds from parents |                                                                    | 0.95 [0, 1]                      | 1.11 [0, 1]                                 | 1.72 [0, 2]                            | 3.11 [0, 5]                        | *                                        |                                                |                                                     |
| Money in emergency funds received in past year from parents        |                                                                    | \$ 1169 [0, 210]                 | \$ 1000 [0, 223]                            | \$ 1020 [0, 536]                       | \$ 884 [0, 1042]                   |                                          |                                                |                                                     |
| Parent ever co-signed loan                                         |                                                                    | 7%                               | 12%                                         | 9%                                     | 5%                                 |                                          |                                                |                                                     |
| Other adult provides financial assistance                          |                                                                    | 7%                               | 18%                                         | 20%                                    | 25%                                | *                                        | *                                              | *                                                   |
| Ever moved back home after first leaving                           |                                                                    | 27%                              | 38%                                         | 38%                                    | 49%                                | *                                        | *                                              |                                                     |
| How many times moved back home after first leaving                 | 0.37 [0, 1]                                                        | 0.70 [0, 1]                      | 0.66 [0, 1]                                 | 1.11 [0, 1]                            | *                                  | *                                        | *                                              |                                                     |

Note. Inform. = informant. Values in “Descriptive Statistics” section are either percentage of sample responding “yes” to criterion, or mean [25<sup>th</sup> percentile, 75<sup>th</sup> percentile]. Rightmost three columns indicate statistical significance of group comparisons ( $\alpha = .05$ , all tests two-sided). The “Controls vs. Probands significant?” column is reproduced from Table 1 for reference.

<sup>a</sup> Complete desistance defined as neither participant nor parent endorsing any DSM symptoms of ADHD.

<sup>b</sup> Any desistance defined as maximum number of DSM symptoms of either inattention or hyperactivity/impulsivity, per either participant or parent report, being less than 5.

<sup>c</sup> Persistence defined as the maximum number of DSM symptoms of either inattention or hyperactivity/impulsivity, per either participant or parent report, being equal to or greater than 5.

Table S4  
*Results of Statistical Mediation Analyses*

| <b>Financial Outcome</b>                                        | <b>Effect</b>                  | <b>Estimate [95% CI]</b> | <b>Statistical Significance</b> |
|-----------------------------------------------------------------|--------------------------------|--------------------------|---------------------------------|
| Monthly income (in thousands)                                   | <i>a</i>                       | -1.141 [-1.323, -0.959]  | ***                             |
|                                                                 | <i>b</i>                       | 0.459 [0.299, 0.619]     | ***                             |
|                                                                 | Direct effect ( <i>c'</i> )    | -0.796 [-1.200, -0.392]  | ***                             |
|                                                                 | Indirect effect ( <i>a*b</i> ) | -0.523 [-0.725, -0.321]  | ***                             |
|                                                                 | Total effect                   | -1.319 [-1.683, -0.955]  | ***                             |
| Money in savings account (in thousands)                         | <i>a</i>                       | -1.141 [-1.323, -0.959]  | ***                             |
|                                                                 | <i>b</i>                       | 2.914 [1.262, 4.566]     | ***                             |
|                                                                 | Direct effect ( <i>c'</i> )    | -2.655 [-6.949, 1.639]   |                                 |
|                                                                 | Indirect effect ( <i>a*b</i> ) | -3.324 [-5.282, -1.366]  | **                              |
|                                                                 | Total effect                   | -5.979 [-9.811, -2.147]  | **                              |
| Living with parents/family (combined report)                    | <i>a</i>                       | -1.141 [-1.333, -0.949]  | ***                             |
|                                                                 | <i>b</i>                       | -0.220 [-0.334, -0.106]  | ***                             |
|                                                                 | Direct effect ( <i>c'</i> )    | 0.554 [0.234, 0.874]     | **                              |
|                                                                 | Indirect effect ( <i>a*b</i> ) | 0.251 [0.115, 0.387]     | ***                             |
|                                                                 | Total effect                   | 0.805 [0.513, 1.097]     | ***                             |
| Regularly receiving money from parents/family (combined report) | <i>a</i>                       | -1.141 [-1.333, -0.949]  | ***                             |
|                                                                 | <i>b</i>                       | -0.114 [-0.240, 0.012]   | †                               |
|                                                                 | Direct effect ( <i>c'</i> )    | 0.480 [0.134, 0.826]     | **                              |
|                                                                 | Indirect effect ( <i>a*b</i> ) | 0.130 [-0.016, 0.276]    | †                               |
|                                                                 | Total effect                   | 0.610 [0.300, 0.920]     | ***                             |

*Note.* See Figure S3 for diagram of path analysis model that was fit. *a* is the regression coefficient relating childhood ADHD to educational attainment at age 25. *b* is the regression coefficient relating educational attainment at age 25 to the financial outcome at age 30. The direct effect (*c'*) is the component of the effect of childhood ADHD on the financial outcome at age 30 that is not mediated by educational attainment at age 25. The indirect effect (*a\*b*) is the component of the effect of childhood ADHD on financial outcome at age 30 that is mediated educational attainment at age 25. Estimates are from unstandardized solution.

Confidence intervals are estimate plus or minus two standard errors; statistical significance column is based on the asymptotic normal theory test of estimate and its standard error. For continuous outcomes (income and savings), model was fit using the maximum likelihood (ML) estimator. For binary outcomes (living with parents/family and regularly receiving money from parents/family), model was fit using the weighted least squares mean and variance adjusted (WLSMV) estimator and the delta parameterization. The interaction between childhood ADHD and educational attainment was not statistically significant in any model and so was not included (Mackinnon et al., in press).

†  $p < .10$ , \*  $p < .05$ , \*\*  $p < .01$ , \*\*\*  $p < .001$



Table S5

*Confidence Intervals for Proband/Control Differences at Age 30 and Difference-in-Differences from Age 25 to 30*

| Inform.                                                            | Outcome                                                            | Difference at age 30          |                            | Difference-in-difference from age 25 to 30 |                            |   |
|--------------------------------------------------------------------|--------------------------------------------------------------------|-------------------------------|----------------------------|--------------------------------------------|----------------------------|---|
|                                                                    |                                                                    | Coefficient [95% CI]          | Sig.                       | Coefficient [95% CI]                       | Sig.                       |   |
| Adult                                                              | Currently employed full-time                                       | -0.7788 [-1.2022, -0.3554]    | *                          | 0.1929 [-0.3629, 0.7487]                   |                            |   |
|                                                                    | Currently unemployed                                               | 0.6626 [0.1577, 1.1676]       | *                          | 0.0352 [-0.6196, 0.6901]                   |                            |   |
|                                                                    | Living with parents/family                                         | 1.244 [0.715, 1.773]          | *                          | 0.7090 [0.0542, 1.3637]                    | *                          |   |
|                                                                    | Regularly receives money from parents/family                       | 0.7793 [0.0066, 1.5520]       | *                          | 0.6627 [-0.2901, 1.6155]                   |                            |   |
|                                                                    | Monthly rent/housing expenses                                      | -362.84 [-469.07, -256.61]    | *                          | -314.58 [-420.53, -208.63]                 | *                          |   |
|                                                                    | Receiving welfare/government assistance                            | 0.7477 [-0.0502, 1.5456]      |                            | -1.176 [-2.554, 0.201]                     |                            |   |
|                                                                    | Monthly income                                                     | -1319.00 [-1676.51, -961.49]  | *                          | -1008.49 [-1342.20, -674.77]               | *                          |   |
|                                                                    | Money in savings account                                           | -5979.37 [-9740.85, -2217.89] | *                          | -4319.45 [-7937.90, -701.00]               | *                          |   |
|                                                                    | Number of credit cards                                             | -1.169 [-1.625, -0.714]       | *                          | -0.9303 [-1.3886, -0.4719]                 | *                          |   |
|                                                                    | Number of times rejected for credit card                           | 1.295 [0.176, 2.414]          | *                          | 1.053 [0.005, 2.102]                       | *                          |   |
|                                                                    | Number of times credit card cancelled by issuer                    | 0.0604 [-0.1183, 0.2390]      |                            | 0.0477 [-0.1223, 0.2177]                   |                            |   |
|                                                                    | Ever moved back home after first leaving                           | 0.0660 [-0.3481, 0.4802]      |                            | -0.2450 [-0.8469, 0.3569]                  |                            |   |
|                                                                    | How many times moved back home after first leaving                 | 0.0724 [-0.0667, 0.2114]      |                            | 0.0132 [-0.1157, 0.1420]                   |                            |   |
|                                                                    | Has debt                                                           | -0.1006 [-0.4852, 0.2840]     |                            | -0.2486 [-0.7757, 0.2785]                  |                            |   |
|                                                                    | Money in debt                                                      | -135.87 [-808.49, 536.76]     |                            | -150.47 [-808.40, 507.46]                  |                            |   |
|                                                                    | Ever received emergency funds from parents                         | 0.1062 [-0.2832, 0.4957]      |                            | -0.1672 [-0.7182, 0.3839]                  |                            |   |
|                                                                    | Number of times in past year received emergency funds from parents | 0.3064 [-0.0045, 0.6172]      |                            | 0.2793 [-0.0321, 0.5907]                   |                            |   |
|                                                                    | Money in emergency funds received in past year from parents        | 91.50 [-324.20, 507.20]       |                            | 85.21 [-331.81, 502.23]                    |                            |   |
|                                                                    | Parent                                                             | Owens a home                  | -0.9251 [-1.3317, -0.5185] | *                                          | -0.7140 [-1.3239, -0.1040] | * |
|                                                                    |                                                                    | Living with parents/family    | 1.410 [0.795, 2.026]       | *                                          | 1.060 [0.329, 1.791]       | * |
| Regularly receives money from parents/family                       |                                                                    | 1.219 [0.555, 1.884]          | *                          | 0.7045 [-0.1612, 1.5702]                   |                            |   |
| Ever received emergency funds from parents                         |                                                                    | 0.7708 [0.3562, 1.1853]       | *                          | 0.4067 [-0.1737, 0.9871]                   |                            |   |
| Number of times in past year received emergency funds from parents |                                                                    | 1.155 [0.356, 1.954]          | *                          | 0.9855 [0.1863, 1.7847]                    | *                          |   |
| Money in emergency funds received in past year from parents        |                                                                    | 90.09 [-1340.71, 1520.90]     |                            | 81.89 [-1352.56, 1516.34]                  |                            |   |
| Parent ever co-signed loan                                         |                                                                    | 0.1716 [-0.6214, 0.9646]      |                            | 0.5270 [-0.5335, 1.5874]                   |                            |   |
| Other adult provides financial assistance                          |                                                                    | 1.298 [0.596, 2.000]          | *                          | 0.7783 [-0.1266, 1.6833]                   |                            |   |
| Ever moved back home after first leaving                           |                                                                    | 0.6370 [0.2040, 1.0699]       | *                          | -0.0003 [-0.6376, 0.6370]                  |                            |   |
| How many times moved back home after first leaving                 |                                                                    | 0.4256 [0.1785, 0.6726]       | *                          | 0.3309 [0.0834, 0.5784]                    | *                          |   |

*Note.* Inform. = informant, Sig. = statistical significance. Values correspond to the significance tests reported in rightmost two columns of Table 1. For difference at age 30, coefficient is that on ADHD in OLS regression for nonbinary outcomes and in logistic regression for binary outcomes (see Methods). For difference-in-difference from age 25 to 30, coefficient is that on ADHD in OLS regression for nonbinary outcomes and that on the interaction between ADHD status and timepoint in logistic regression for nonbinary outcomes (see Methods).

\*  $p < .05$

Table S6  
*Projected Savings for White Males at Age 64 by Group*

| Assumptions   |              |      | Results                 |           |                      |                   |
|---------------|--------------|------|-------------------------|-----------|----------------------|-------------------|
| Interest Rate | Savings Rate |      | Projected Savings at 64 |           | Ctrl-ADHD Difference | Percent Reduction |
|               | Ctrl         | ADHD | Ctrl                    | ADHD      |                      |                   |
| 3%            | 3%           | 3%   | 166,800                 | 96,200    | 70,600               | 42%               |
| 3%            | 5%           | 3%   | 278,000                 | 96,200    | 181,800              | 65%               |
| 3%            | 5%           | 5%   | 278,000                 | 160,300   | 117,700              | 42%               |
| 3%            | 7%           | 3%   | 389,200                 | 96,200    | 293,000              | 75%               |
| 3%            | 7%           | 5%   | 389,200                 | 160,300   | 228,900              | 59%               |
| 3%            | 7%           | 7%   | 389,200                 | 224,500   | 164,800              | 42%               |
| 5%            | 3%           | 3%   | 255,100                 | 149,700   | 105,400              | 41%               |
| 5%            | 5%           | 3%   | 425,200                 | 149,700   | 275,500              | 65%               |
| 5%            | 5%           | 5%   | 425,200                 | 249,500   | 175,600              | 41%               |
| 5%            | 7%           | 3%   | 595,200                 | 149,700   | 445,500              | 75%               |
| 5%            | 7%           | 5%   | 595,200                 | 249,500   | 345,700              | 58%               |
| 5%            | 7%           | 7%   | 595,200                 | 349,400   | 245,900              | 41%               |
| 7%            | 3%           | 3%   | 403,100                 | 240,900   | 162,300              | 40%               |
| 7%            | 5%           | 3%   | 671,900                 | 240,900   | 431,000              | 64%               |
| 7%            | 5%           | 5%   | 671,900                 | 401,400   | 270,400              | 40%               |
| 7%            | 7%           | 3%   | 940,600                 | 240,900   | 699,700              | 74%               |
| 7%            | 7%           | 5%   | 940,600                 | 401,400   | 539,200              | 57%               |
| 7%            | 7%           | 7%   | 940,600                 | 562,000   | 378,600              | 40%               |
| 10%           | 3%           | 3%   | 841,200                 | 515,600   | 325,600              | 39%               |
| 10%           | 5%           | 3%   | 1,402,000               | 515,600   | 886,400              | 63%               |
| 10%           | 5%           | 5%   | 1,402,000               | 859,300   | 542,700              | 39%               |
| 10%           | 7%           | 3%   | 1,962,800               | 515,600   | 1,447,200            | 74%               |
| 10%           | 7%           | 5%   | 1,962,800               | 859,300   | 1,103,500            | 56%               |
| 10%           | 7%           | 7%   | 1,962,800               | 1,203,000 | 759,700              | 39%               |

*Note.* Values are in 2018 USD, rounded to nearest \$100. Based on rescaled ACS income projections (Table S9). Includes all white male participants, regardless of employment status ( $N = 444$ ). See text of supplementary material for discussion of plausibility of these projections.

Table S7

*Census Estimates of Mean Total Income Between Ages 25-64 for Education and Employment Profiles in White Males*

| <b>Education</b>     | <b>Work Status</b>           |                                      |                                      |
|----------------------|------------------------------|--------------------------------------|--------------------------------------|
|                      | <b>Unemployed<br/>\$ USD</b> | <b>Employed part-time<br/>\$ USD</b> | <b>Employed full-time<br/>\$ USD</b> |
| 9th to 12th grade    | 405,000                      | 797,300                              | 1,817,500                            |
| High school graduate | 576,900                      | 976,000                              | 2,139,700                            |
| Some college         | 762,000                      | 1,177,900                            | 2,608,000                            |
| Associates degree    | 834,500                      | 1,244,100                            | 2,696,500                            |
| Bachelors degree     | 1,222,200                    | 1,850,200                            | 4,184,100                            |
| Graduate training    | 1,631,500                    | 2,779,200                            | 5,570,000                            |

*Note.* Values are weighted means in 2018 USD, rounded to nearest \$100. Based on 2012-2016 American Community Survey (ACS). “Graduate training” combines Masters, Professional, and Doctoral degree categories in ACS.

Table S8

*Census Estimates of Mean Annual Income Across Ages 25-64 for Education and Employment Profiles in White Males*

| Work Status        | Education            | Mean Annual Income in 5-Year Spans of Age in Years |          |          |          |          |          |          |          |
|--------------------|----------------------|----------------------------------------------------|----------|----------|----------|----------|----------|----------|----------|
|                    |                      | 25 to 29                                           | 30 to 34 | 35 to 39 | 40 to 44 | 45 to 49 | 50 to 54 | 55 to 59 | 60 to 64 |
| Unemployed         | 9th to 12th grade    | 6,600                                              | 7,400    | 8,300    | 8,700    | 9,400    | 10,700   | 12,900   | 17,200   |
|                    | High school graduate | 8,800                                              | 9,700    | 11,200   | 11,600   | 13,300   | 15,100   | 19,800   | 26,100   |
|                    | Some college         | 10,200                                             | 13,000   | 14,900   | 15,900   | 18,900   | 20,700   | 26,300   | 32,900   |
|                    | Associates degree    | 11,100                                             | 14,400   | 16,200   | 17,900   | 20,200   | 22,800   | 28,300   | 36,600   |
|                    | Bachelors degree     | 13,700                                             | 19,100   | 22,800   | 28,900   | 30,800   | 35,200   | 44,600   | 49,700   |
| Employed part-time | Graduate training    | 13,000                                             | 19,300   | 31,900   | 38,400   | 47,400   | 47,800   | 61,900   | 67,200   |
|                    | 9th to 12th grade    | 13,300                                             | 17,600   | 17,100   | 20,200   | 21,100   | 20,700   | 23,300   | 26,300   |
|                    | High school graduate | 15,100                                             | 18,100   | 21,200   | 23,000   | 25,200   | 26,000   | 30,500   | 36,000   |
|                    | Some college         | 16,900                                             | 20,600   | 24,100   | 27,600   | 31,000   | 34,300   | 38,300   | 42,400   |
|                    | Associates degree    | 17,200                                             | 21,400   | 24,700   | 29,300   | 33,900   | 35,400   | 43,200   | 43,300   |
| Employed full-time | Bachelors degree     | 19,500                                             | 30,100   | 37,400   | 46,800   | 51,700   | 58,500   | 63,100   | 62,200   |
|                    | Graduate training    | 20,500                                             | 36,200   | 57,800   | 74,100   | 82,800   | 89,400   | 97,300   | 97,400   |
|                    | 9th to 12th grade    | 32,600                                             | 38,600   | 43,700   | 46,800   | 47,100   | 49,400   | 50,200   | 54,400   |
|                    | High school graduate | 37,900                                             | 45,000   | 52,000   | 54,300   | 57,600   | 59,300   | 60,700   | 61,000   |
|                    | Some college         | 41,300                                             | 51,700   | 61,800   | 67,400   | 72,200   | 74,400   | 76,100   | 76,100   |
|                    | Associates degree    | 44,500                                             | 55,200   | 64,000   | 68,800   | 73,800   | 77,800   | 78,200   | 77,100   |
|                    | Bachelors degree     | 57,300                                             | 77,600   | 99,300   | 111,700  | 122,100  | 126,500  | 124,400  | 117,700  |
|                    | Graduate training    | 65,000                                             | 95,200   | 129,100  | 150,200  | 165,400  | 171,100  | 173,000  | 167,800  |

*Note.* Values are weighted means in 2018 USD, rounded to nearest \$100. Based on 2012-2016 American Community Survey (ACS). “Graduate training” combines Masters, Professional, and Doctoral degree categories in ACS.

Table S9

*Rescaled Census Estimates of Mean Annual Income Across Ages 25-64 for Education and Employment Profiles in White Males*

| Work Status        | Education            | Group   | Mean Annual Income in 5-Year Spans of Age in Years |          |          |          |          |          |          |          |
|--------------------|----------------------|---------|----------------------------------------------------|----------|----------|----------|----------|----------|----------|----------|
|                    |                      |         | 25 to 29                                           | 30 to 34 | 35 to 39 | 40 to 44 | 45 to 49 | 50 to 54 | 55 to 59 | 60 to 64 |
| Unemployed         | 9th to 12th grade    | Control | 6,600                                              | 7,200    | 8,000    | 8,300    | 8,800    | 9,900    | 11,700   | 15,100   |
|                    |                      | ADHD    | 6,600                                              | 7,000    | 7,400    | 7,600    | 7,900    | 8,600    | 9,600    | 11,700   |
|                    | High school graduate | Control | 8,800                                              | 9,500    | 10,700   | 11,100   | 12,400   | 13,800   | 17,600   | 22,700   |
|                    |                      | ADHD    | 8,800                                              | 9,200    | 10,000   | 10,200   | 11,000   | 11,900   | 14,200   | 17,200   |
|                    | Some college         | Control | 10,200                                             | 12,400   | 14,000   | 14,800   | 17,200   | 18,600   | 23,100   | 28,400   |
|                    |                      | ADHD    | 10,200                                             | 11,600   | 12,500   | 13,000   | 14,400   | 15,300   | 18,000   | 21,200   |
|                    | Associates degree    | Control | 11,100                                             | 13,700   | 15,100   | 16,500   | 18,400   | 20,500   | 24,900   | 31,500   |
|                    |                      | ADHD    | 11,100                                             | 12,700   | 13,500   | 14,400   | 15,500   | 16,800   | 19,400   | 23,500   |
|                    | Bachelors degree     | Control | 13,700                                             | 18,000   | 21,000   | 25,800   | 27,400   | 30,900   | 38,400   | 42,500   |
|                    |                      | ADHD    | 13,700                                             | 16,300   | 18,100   | 21,100   | 22,000   | 24,100   | 28,700   | 31,200   |
|                    | Graduate training    | Control | 13,000                                             | 18,000   | 28,100   | 33,300   | 40,500   | 40,800   | 52,100   | 56,400   |
|                    |                      | ADHD    | 13,000                                             | 16,000   | 22,200   | 25,300   | 29,700   | 29,900   | 36,700   | 39,300   |
| Employed part-time | 9th to 12th grade    | Control | 13,300                                             | 16,700   | 16,400   | 18,800   | 19,600   | 19,200   | 21,300   | 23,700   |
|                    |                      | ADHD    | 13,300                                             | 15,400   | 15,200   | 16,600   | 17,100   | 16,900   | 18,200   | 19,600   |
|                    | High school graduate | Control | 15,100                                             | 17,500   | 19,900   | 21,400   | 23,200   | 23,900   | 27,400   | 31,800   |
|                    |                      | ADHD    | 15,100                                             | 16,600   | 18,000   | 18,900   | 20,000   | 20,400   | 22,600   | 25,200   |
|                    | Some college         | Control | 16,900                                             | 19,800   | 22,700   | 25,500   | 28,200   | 30,800   | 34,000   | 37,300   |
|                    |                      | ADHD    | 16,900                                             | 18,700   | 20,400   | 22,100   | 23,800   | 25,300   | 27,300   | 29,300   |
|                    | Associates degree    | Control | 17,200                                             | 20,500   | 23,200   | 26,900   | 30,500   | 31,700   | 38,000   | 38,100   |
|                    |                      | ADHD    | 17,200                                             | 19,200   | 20,800   | 23,000   | 25,300   | 26,000   | 29,800   | 29,900   |
|                    | Bachelors degree     | Control | 19,500                                             | 28,000   | 33,800   | 41,300   | 45,300   | 50,800   | 54,400   | 53,700   |
|                    |                      | ADHD    | 19,500                                             | 24,600   | 28,200   | 32,800   | 35,100   | 38,500   | 40,700   | 40,300   |
|                    | Graduate training    | Control | 20,500                                             | 33,100   | 50,300   | 63,400   | 70,400   | 75,700   | 82,000   | 82,100   |
|                    |                      | ADHD    | 20,500                                             | 28,100   | 38,600   | 46,500   | 50,700   | 54,000   | 57,800   | 57,800   |
| Employed full-time | 9th to 12th grade    | Control | 32,600                                             | 37,400   | 41,500   | 44,000   | 44,200   | 46,100   | 46,700   | 50,100   |
|                    |                      | ADHD    | 32,600                                             | 35,500   | 38,000   | 39,500   | 39,600   | 40,800   | 41,100   | 43,200   |
|                    | High school graduate | Control | 37,900                                             | 43,600   | 49,200   | 51,000   | 53,700   | 55,000   | 56,100   | 56,400   |
|                    |                      | ADHD    | 37,900                                             | 41,300   | 44,700   | 45,900   | 47,400   | 48,300   | 48,900   | 49,100   |
|                    | Some college         | Control | 41,300                                             | 49,600   | 57,700   | 62,200   | 66,100   | 67,800   | 69,200   | 69,200   |
|                    |                      | ADHD    | 41,300                                             | 46,400   | 51,300   | 54,000   | 56,300   | 57,400   | 58,200   | 58,200   |
|                    | Associates degree    | Control | 44,500                                             | 53,100   | 60,100   | 63,900   | 68,000   | 71,200   | 71,500   | 70,600   |
|                    |                      | ADHD    | 44,500                                             | 49,700   | 54,000   | 56,300   | 58,700   | 60,700   | 60,900   | 60,300   |
|                    | Bachelors degree     | Control | 57,300                                             | 73,500   | 90,900   | 100,900  | 109,200  | 112,700  | 111,000  | 105,600  |
|                    |                      | ADHD    | 57,300                                             | 67,100   | 77,700   | 83,700   | 88,800   | 90,900   | 89,800   | 86,600   |
|                    | Graduate training    | Control | 65,000                                             | 89,100   | 116,300  | 133,200  | 145,400  | 149,900  | 151,500  | 147,300  |
|                    |                      | ADHD    | 65,000                                             | 79,600   | 96,100   | 106,300  | 113,700  | 116,400  | 117,400  | 114,800  |

*Note.* Values are weighted means in 2018 USD, rounded to nearest \$100. Based on 2012-2016 American Community Survey (ACS). “Graduate training” combines Masters, Professional, and Doctoral degree categories in ACS. ADHD adults rescaled to capture 49% of Census-projected increases in income, and controls rescaled to capture 80% of Census-projected increases in income.

Table S10  
*Census Estimates of Mean Net Worth of White Males, Ages 65-69*

| <b>Education</b>     | <b>Number of Persons</b> | <b>Total Assets</b> | <b>Total Debts</b> | <b>Net Worth</b> |
|----------------------|--------------------------|---------------------|--------------------|------------------|
| 9th to 12th grade    | 78                       | 187,700             | 17,700             | 170,000          |
| High school graduate | 394                      | 299,500             | 35,000             | 264,500          |
| Some college         | 265                      | 379,300             | 49,500             | 329,800          |
| Associates degree    | 104                      | 416,900             | 51,500             | 365,400          |
| Bachelors degree     | 254                      | 802,500             | 72,600             | 729,900          |
| Graduate training    | 211                      | 1,183,500           | 120,600            | 1,062,900        |

*Note.* Values are weighted means in 2018 USD, rounded to nearest \$100. Based on wave 1 of 2014 panel of the Survey of Income and Program Participation (SIPP). “Graduate training” combines Masters, Professional, and Doctoral degree categories in SIPP. Because the SIPP sample size is much smaller than the ACS, number of persons contributing to each estimate are reported in the second column. Only net worth was used in the current study; total assets and total debts are provided for reference only.

Figure S1  
*Binary Financial Indicators at Age 30 for Controls, Probands with Desistant Childhood ADHD, and Probands with Persistent Childhood ADHD*

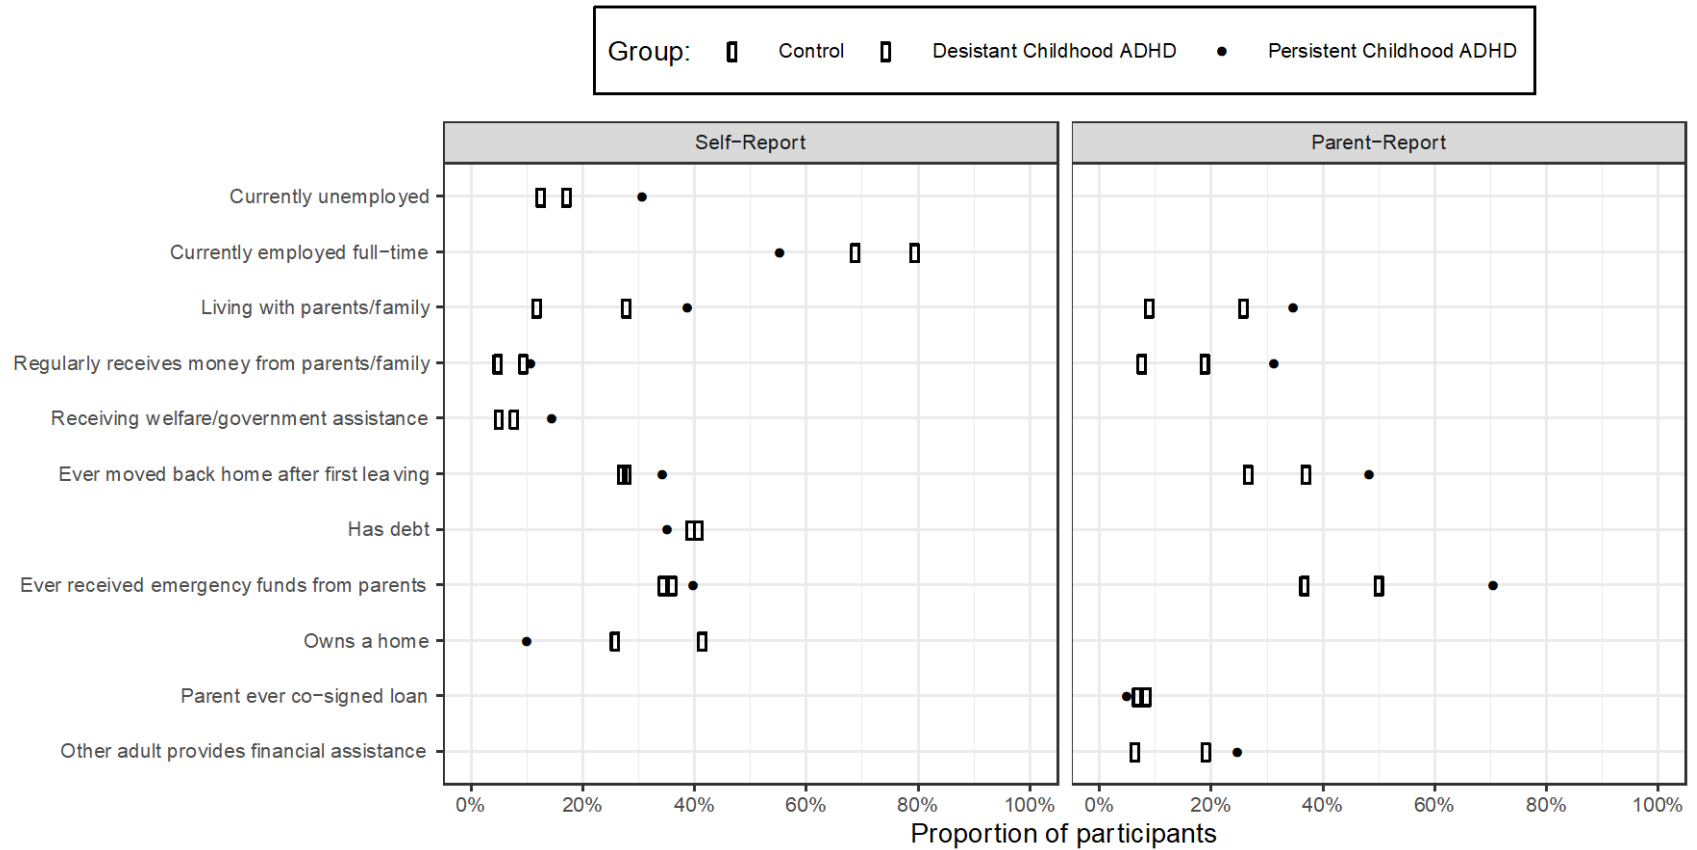

*Note.*  $N = 240$  for controls,  $N = 227$  for desistant childhood ADHD,  $N = 70$  for persistent childhood ADHD. Desistance and persistence were defined via DSM symptoms. Exact values are reported in Table S3.

Figure S2  
*Projected Savings for Males at Age 64 by Group*

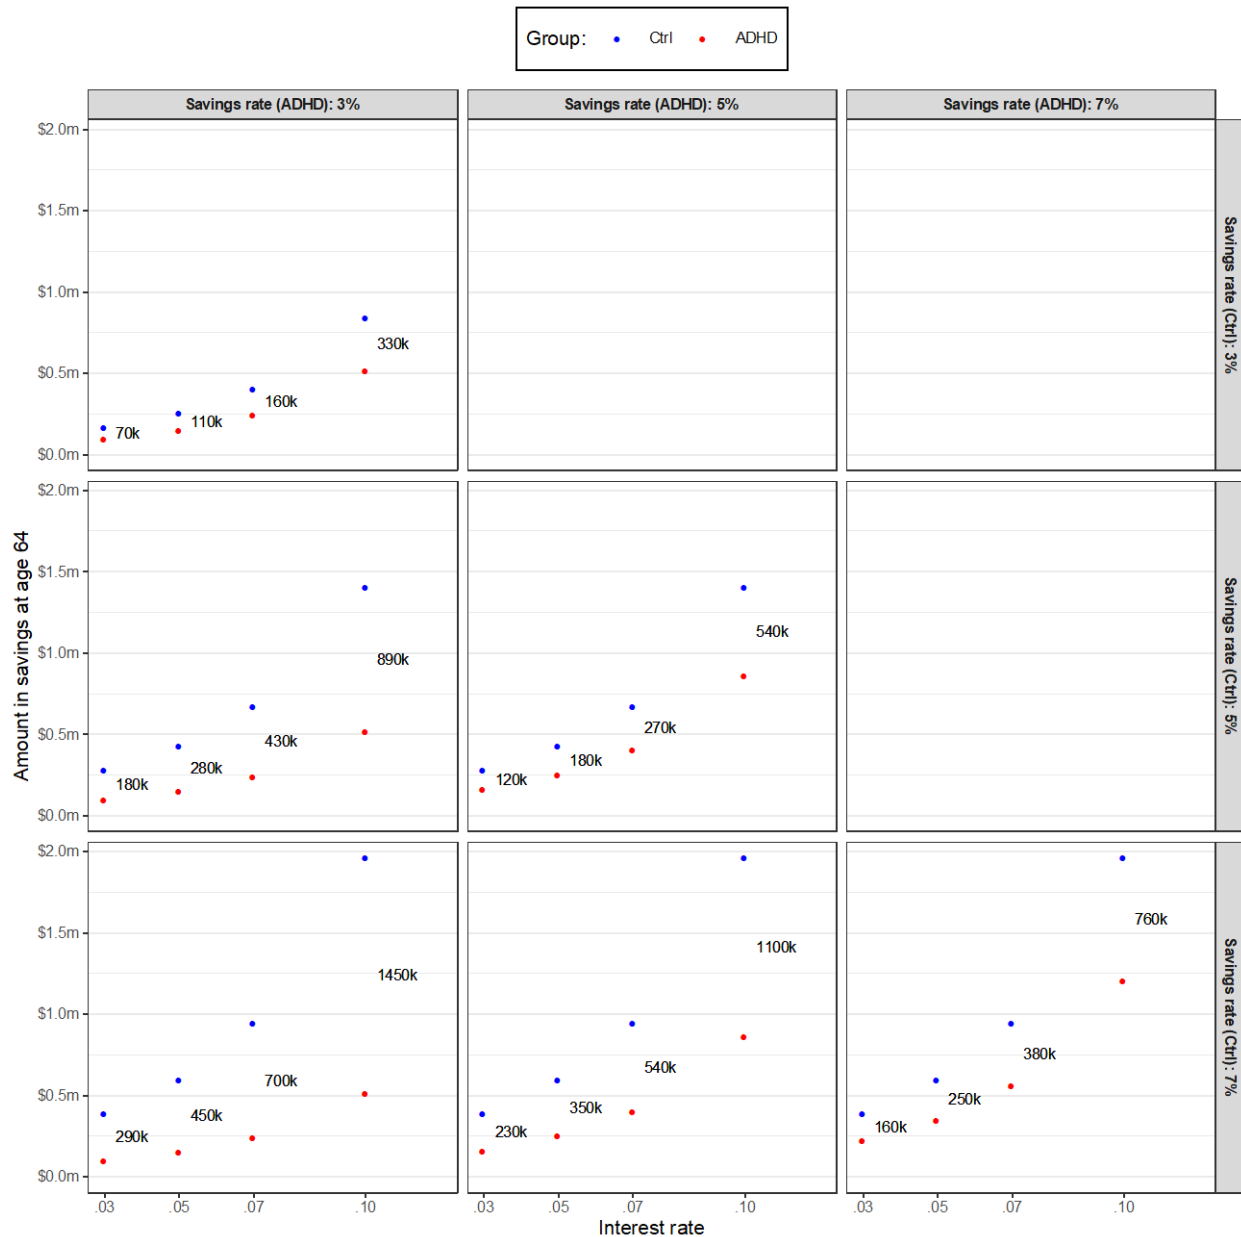

*Note.* Each panel depicts projected ADHD-control gap in savings assuming a specific savings rate in ADHD group (columns) and a specific savings rate in control group (rows). Panels above the diagonal are blank because they reflect conditions in which the savings rate in the ADHD group is higher than the savings rate in the control group, which is implausible. Numbers inside panels are the control-ADHD difference, rounded to the nearest ten-thousand. Exact values are reported in Table S6. Based on rescaled ACS income projections (Table S9). Includes all white male participants, regardless of employment status ( $N = 444$ ). See text of supplementary material for discussion of plausibility of these projections.



Figure S3  
*Statistical Mediation Model Fit in Analysis 1*

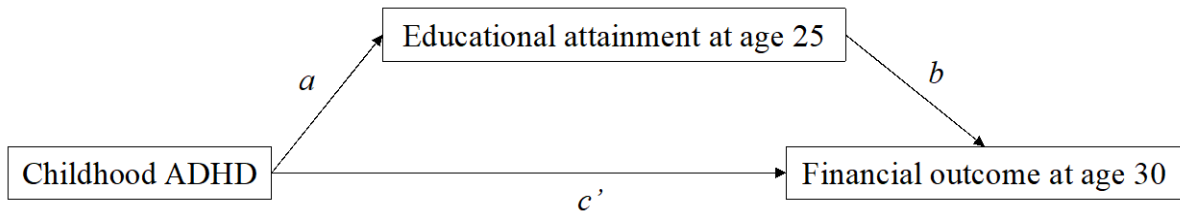

*Note.* This model was fit separately for four financial outcomes: monthly income, money in savings, living with parents/family, and regularly receiving money from parents/family. Estimates are reported in Table S4.
